# Supplementary material
Source: publisher site journal article supplement (https://www.spandidos-publications.com/4243/downloadSupplementary)
Supplement: Supplementary file 1 [file downloadSupplementary]

## Sheet: Sheet1
Table SII. Epithelial-mesenchymal transition in T AMEVs and uniport.
Entry	Entry name	Status	Protein names	Gene names	Organism	Length	Function (CC)	GO
P26038	MOES_HUMAN	reviewed	Moesin	MSN	Homo sapiens (Human)	577	FUNCTION: Ezrin-radixin-moesin (ERM) family protein that connects the actin cytoskeleton to the plasma membrane and thereby regulates the structure and function of specific domains of the cell cortex. Tethers actin filaments by oscillating between a resting and an activated state providing transient interactions between moesin and the actin cytoskeleton (PubMed:10212266). Once phosphorylated on i…	apical part of cell [GO:0045177]; apical plasma membrane [GO:0016324]; basolateral plasma membrane [GO:0016323]; blood microparticle [GO:0072562]; cell periphery [GO:0071944]; cell surface [GO:0009986]; cytoplasm [GO:0005737]; cytoskeleton [GO:0005856]; cytosol [GO:0005829]; extracellular exosome [GO:0070062]; extracellular space [GO:0005615]; filopodium [GO:0030175]; focal adhesion [GO:0005925];…
P15311	EZRI_HUMAN	reviewed	Ezrin	EZR VIL2	Homo sapiens (Human)	586	FUNCTION: Probably involved in connections of major cytoskeletal structures to the plasma membrane. In epithelial cells, required for the formation of microvilli and membrane ruffles on the apical pole. Along with PLEKHG6, required for normal macropinocytosis. {ECO:0000269|PubMed:17881735, ECO:0000269|PubMed:18270268, ECO:0000269|PubMed:19111582}.	actin cytoskeleton [GO:0015629]; actin filament [GO:0005884]; apical part of cell [GO:0045177]; apical plasma membrane [GO:0016324]; astrocyte projection [GO:0097449]; basolateral plasma membrane [GO:0016323]; brush border [GO:0005903]; cell body [GO:0044297]; cell periphery [GO:0071944]; cell projection [GO:0042995]; cell tip [GO:0051286]; ciliary basal body [GO:0036064]; cortical cytoskeleton […
P49841	GSK3B_HUMAN	reviewed	Glycogen synthase kinase-3 beta	GSK3B	Homo sapiens (Human)	420	FUNCTION: Constitutively active protein kinase that acts as a negative regulator in the hormonal control of glucose homeostasis, Wnt signaling and regulation of transcription factors and microtubules, by phosphorylating and inactivating glycogen synthase (GYS1 or GYS2), EIF2B, CTNNB1/beta-catenin, APC, AXIN1, DPYSL2/CRMP2, JUN, NFATC1/NFATC, MAPT/TAU and MACF1. Requires primed phosphorylation of …	axon [GO:0030424]; beta-catenin destruction complex [GO:0030877]; centrosome [GO:0005813]; cytoplasm [GO:0005737]; cytosol [GO:0005829]; dendrite [GO:0030425]; glutamatergic synapse [GO:0098978]; mitochondrion [GO:0005739]; nucleoplasm [GO:0005654]; nucleus [GO:0005634]; plasma membrane [GO:0005886]; postsynapse [GO:0098794]; Wnt signalosome [GO:1990909]; ATP binding [GO:0005524]; beta-catenin bi…
P11021	BIP_HUMAN	reviewed	78 kDa glucose-regulated protein) (GRP-78)	HSPA5 GRP78	Homo sapiens (Human)	654	FUNCTION: Endoplasmic reticulum chaperone that plays a key role in protein folding and quality control in the endoplasmic reticulum lumen (PubMed:2294010, PubMed:23769672, PubMed:23990668, PubMed:28332555). Involved in the correct folding of proteins and degradation of misfolded proteins via its interaction with DNAJC10/ERdj5, probably to facilitate the release of DNAJC10/ERdj5 from its substrate…	cell surface [GO:0009986]; cytoplasm [GO:0005737]; cytosol [GO:0005829]; endoplasmic reticulum [GO:0005783]; endoplasmic reticulum chaperone complex [GO:0034663]; endoplasmic reticulum lumen [GO:0005788]; endoplasmic reticulum membrane [GO:0005789]; endoplasmic reticulum-Golgi intermediate compartment [GO:0005793]; extracellular exosome [GO:0070062]; focal adhesion [GO:0005925]; integral componen…
Q13363	CTBP1_HUMAN	reviewed	C-terminal-binding protein 1	CTBP1 CTBP	Homo sapiens (Human)	440	FUNCTION: Corepressor targeting diverse transcription regulators such as GLIS2 or BCL6. Has dehydrogenase activity. Involved in controlling the equilibrium between tubular and stacked structures in the Golgi complex. Functions in brown adipose tissue (BAT) differentiation. {ECO:0000269|PubMed:12419229, ECO:0000269|PubMed:15542832, ECO:0000269|PubMed:18212045, ECO:0000269|PubMed:19103759, ECO:0000…	GABA-ergic synapse [GO:0098982]; glutamatergic synapse [GO:0098978]; nucleoplasm [GO:0005654]; nucleus [GO:0005634]; presynaptic active zone cytoplasmic component [GO:0098831]; transcription factor complex [GO:0005667]; transcriptional repressor complex [GO:0017053]; DNA-binding transcription factor activity [GO:0003700]; identical protein binding [GO:0042802]; NAD binding [GO:0051287]; oxidoredu…
P56545	CTBP2_HUMAN	reviewed	C-terminal-binding protein 2	CTBP2	Homo sapiens (Human)	445	FUNCTION: Corepressor targeting diverse transcription regulators. Functions in brown adipose tissue (BAT) differentiation (By similarity). {ECO:0000250}.; FUNCTION: Isoform 2 probably acts as a scaffold for specialized synapses.	cell junction [GO:0030054]; GABA-ergic synapse [GO:0098982]; glutamatergic synapse [GO:0098978]; nucleus [GO:0005634]; photoreceptor ribbon synapse [GO:0098684]; presynaptic active zone cytoplasmic component [GO:0098831]; presynaptic cytosol [GO:0099523]; transcriptional repressor complex [GO:0017053]; chromatin binding [GO:0003682]; NAD binding [GO:0051287]; oxidoreductase activity, acting on th…
Q8N163	CCAR2_HUMAN	reviewed	Cell cycle and apoptosis regulator protein 2	CCAR2 DBC1 KIAA1967	Homo sapiens (Human)	923	FUNCTION: Core component of the DBIRD complex, a multiprotein complex that acts at the interface between core mRNP particles and RNA polymerase II (RNAPII) and integrates transcript elongation with the regulation of alternative splicing: the DBIRD complex affects local transcript elongation rates and alternative splicing of a large set of exons embedded in (A + T)-rich DNA regions. Inhibits SIRT1…	cytoplasm [GO:0005737]; DBIRD complex [GO:0044609]; mitochondrial matrix [GO:0005759]; nuclear chromatin [GO:0000790]; nucleoplasm [GO:0005654]; nucleus [GO:0005634]; enzyme binding [GO:0019899]; enzyme inhibitor activity [GO:0004857]; nuclear receptor transcription coactivator activity [GO:0030374]; RNA binding [GO:0003723]; RNA polymerase II complex binding [GO:0000993]; cell cycle [GO:0007049]…
Q92520	FAM3C_HUMAN	reviewed	Interleukin-like EMT inducer	FAM3C ILEI GS3786	Homo sapiens (Human)	227	FUNCTION: May be involved in retinal laminar formation. Promotes epithelial to mesenchymal transition.	extracellular exosome [GO:0070062]; extracellular region [GO:0005576]; Golgi apparatus [GO:0005794]; platelet dense granule lumen [GO:0031089]; cytokine activity [GO:0005125]; multicellular organism development [GO:0007275]; negative regulation of gluconeogenesis [GO:0045721]; platelet degranulation [GO:0002576]
P49773	HINT1_HUMAN	reviewed	Histidine triad nucleotide-binding protein 1	HINT1 HINT PKCI1 PRKCNH1	Homo sapiens (Human)	126	FUNCTION: Hydrolyzes purine nucleotide phosphoramidates with a single phosphate group, including adenosine 5'monophosphoramidate (AMP-NH2), adenosine 5'monophosphomorpholidate (AMP-morpholidate) and guanosine 5'monophosphomorpholidate (GMP-morpholidate). Hydrolyzes lysyl-AMP (AMP-N-epsilon-(N-alpha-acetyl lysine methyl ester)) generated by lysine tRNA ligase, as well as Met-AMP, His-AMP and Asp-A…	cytoskeleton [GO:0005856]; cytosol [GO:0005829]; extracellular exosome [GO:0070062]; histone deacetylase complex [GO:0000118]; nucleus [GO:0005634]; plasma membrane [GO:0005886]; hydrolase activity [GO:0016787]; nucleotide binding [GO:0000166]; protein kinase C binding [GO:0005080]; intrinsic apoptotic signaling pathway by p53 class mediator [GO:0072332]; positive regulation of calcium-mediated s…
Q86WV6	STING_HUMAN	reviewed	Stimulator of interferon genes protein	TMEM173 ERIS MITA STING	Homo sapiens (Human)	379	FUNCTION: Facilitator of innate immune signaling that acts as a sensor of cytosolic DNA from bacteria and viruses and promotes the production of type I interferon (IFN-alpha and IFN-beta) (PubMed:18724357, PubMed:18818105, PubMed:19433799, PubMed:19776740, PubMed:23027953, PubMed:23910378, PubMed:23747010, PubMed:30842659). Innate immune response is triggered in response to non-CpG double-strande…	autophagosome [GO:0005776]; autophagosome membrane [GO:0000421]; cytoplasmic vesicle membrane [GO:0030659]; endoplasmic reticulum membrane [GO:0005789]; endosome [GO:0005768]; integral component of endoplasmic reticulum-Golgi intermediate compartment (ERGIC) membrane [GO:1990701]; mitochondrial outer membrane [GO:0005741]; perinuclear region of cytoplasm [GO:0048471]; plasma membrane [GO:0005886]…
P62942	FKB1A_HUMAN	reviewed	FK506-binding protein 1A	FKBP1A FKBP1 FKBP12	Homo sapiens (Human)	108	FUNCTION: Keeps in an inactive conformation TGFBR1, the TGF-beta type I serine/threonine kinase receptor, preventing TGF-beta receptor activation in absence of ligand. Recruits SMAD7 to ACVR1B which prevents the association of SMAD2 and SMAD3 with the activin receptor complex, thereby blocking the activin signal. May modulate the RYR1 calcium channel activity. PPIases accelerate the folding of pr…	cytoplasm [GO:0005737]; cytoplasmic side of membrane [GO:0098562]; cytosol [GO:0005829]; extrinsic component of organelle membrane [GO:0031312]; membrane [GO:0016020]; ryanodine receptor complex [GO:1990425]; sarcoplasmic reticulum [GO:0016529]; terminal cisterna [GO:0014802]; Z disc [GO:0030018]; activin binding [GO:0048185]; FK506 binding [GO:0005528]; ion channel binding [GO:0044325]; macrolid…
Q9Y624	JAM1_HUMAN	reviewed	Junctional adhesion molecule 1	F11R JAM1 JCAM UNQ264/PRO301	Homo sapiens (Human)	299	FUNCTION: Seems to play a role in epithelial tight junction formation. Appears early in primordial forms of cell junctions and recruits PARD3 (PubMed:11489913). The association of the PARD6-PARD3 complex may prevent the interaction of PARD3 with JAM1, thereby preventing tight junction assembly (By similarity). Plays a role in regulating monocyte transmigration involved in integrity of epithelial …	bicellular tight junction [GO:0005923]; cell junction [GO:0030054]; cell-cell junction [GO:0005911]; cytoplasmic vesicle [GO:0031410]; extracellular exosome [GO:0070062]; integral component of membrane [GO:0016021]; plasma membrane [GO:0005886]; slit diaphragm [GO:0036057]; cadherin binding [GO:0045296]; PDZ domain binding [GO:0030165]; virus receptor activity [GO:0001618]; actomyosin structure o…
P62987	RL40_HUMAN	reviewed	Ubiquitin A-52 residue ribosomal protein fusion product 1	UBA52 UBCEP2	Homo sapiens (Human)	128	FUNCTION: Ubiquitin: Exists either covalently attached to another protein, or free (unanchored). When covalently bound, it is conjugated to target proteins via an isopeptide bond either as a monomer (monoubiquitin), a polymer linked via different Lys residues of the ubiquitin (polyubiquitin chains) or a linear polymer linked via the initiator Met of the ubiquitin (linear polyubiquitin chains). Po…	cytoplasm [GO:0005737]; cytosol [GO:0005829]; cytosolic large ribosomal subunit [GO:0022625]; cytosolic small ribosomal subunit [GO:0022627]; endocytic vesicle membrane [GO:0030666]; endoplasmic reticulum [GO:0005783]; endoplasmic reticulum membrane [GO:0005789]; endosome membrane [GO:0010008]; extracellular exosome [GO:0070062]; extracellular space [GO:0005615]; host cell [GO:0043657]; lysosomal…
O00560	SDCB1_HUMAN	reviewed	Melanoma differentiation-associated protein 9	SDCBP MDA9 SYCL	Homo sapiens (Human)	298	FUNCTION: Multifunctional adapter protein involved in diverse array of functions including trafficking of transmembrane proteins, neuro and immunomodulation, exosome biogenesis, and tumorigenesis (PubMed:26291527). Positively regulates TGFB1-mediated SMAD2/3 activation and TGFB1-induced epithelial-to-mesenchymal transition (EMT) and cell migration in various cell types. May increase TGFB1 signali…	adherens junction [GO:0005912]; azurophil granule lumen [GO:0035578]; blood microparticle [GO:0072562]; cytoplasm [GO:0005737]; cytoskeleton [GO:0005856]; cytosol [GO:0005829]; endoplasmic reticulum membrane [GO:0005789]; extracellular exosome [GO:0070062]; extracellular region [GO:0005576]; extracellular space [GO:0005615]; extracellular vesicle [GO:1903561]; focal adhesion [GO:0005925]; interle…
P61586	RHOA_HUMAN	reviewed	Transforming protein RhoA	RHOA ARH12 ARHA RHO12	Homo sapiens (Human)	193	FUNCTION: Small GTPase which cycles between an active GTP-bound and an inactive GDP-bound state. Mainly associated with cytoskeleton organization, in active state binds to a variety of effector proteins to regulate cellular responses such cytoskeletal dynamics, cell migration and cell cycle. Regulates a signal transduction pathway linking plasma membrane receptors to the assembly of focal adhesio…	apical junction complex [GO:0043296]; axon [GO:0030424]; cell cortex [GO:0005938]; cell division site [GO:0032153]; cell junction [GO:0030054]; cell periphery [GO:0071944]; cleavage furrow [GO:0032154]; cytoplasm [GO:0005737]; cytoskeleton [GO:0005856]; cytosol [GO:0005829]; dendritic spine [GO:0043197]; endoplasmic reticulum membrane [GO:0005789]; endosome [GO:0005768]; extracellular exosome [GO…
GO, Gene Ontology; CC, cellular component.
